# Supplementary material for: Cabbage (<em>Brassica oleracea</em> var. <em>capitata</em>) Development in Time: How Differential Parenchyma Tissue Growth Affects Leafy Head Formation
Source: Preprints.org preprint supplement (doi:10.20944/preprints202402.1192.v1), 2024-02-21
Supplement: Supplementary file 1 [file supplementary]

## Sheet: Table S1
Supplementary Table 1. Number of leaves at different days after sowing (DAS) for the different B. olareacea morphotypes
28 DAS		Block 1			Block 2			Block 3			Average (# leaves)
	Round	2	2	2	3	2	2	2	2	2	2.11111
	Pointed	3	2	4	3	3	3	3	3	3	3
	Collard	2	2	3	2	2	3	3	4	2	2.55556
35 DAS		Block 1			Block 2			Block 3			Average (# leaves)
	Round	5	4	6	5	5	5	5	5	5	5
	Pointed	8	8	8	7	8	7	7	7	8	7.55556
	Collard	7	6	7	6	7	7	6	6	5	6.33333
42 DAS		Block 1			Block 2			Block 3			Average (# leaves)
	Round	9	8	9	9	9	9	10	8	9	8.88889
	Pointed	11	11	12	11	10	11	12	11	11	11.1111
	Collard	9	10	10	9	10	10	9	9	8	9.33333
49 DAS		Block 1			Block 2			Block 3			Average (# leaves)
	Round	12	10	13	14	13	13	12	12	12	12.3333
	Pointed	14	15	15	15	16	16	15	14	15	15
	Collard	12	13	13	14	13	13	12	13	12	12.7778
56 DAS		Block 1			Block 2			Block 3			Average (# leaves)
	Round	16	15	17	16	17	17	16	17	15	16.2222
	Pointed	21	23	-	23	23	-	23	21	-	22.3333
	Collard	17	16	17	16	17	18	15	15	16	16.3333
63 DAS		Block 1			Block 2			Block 3			Average (# leaves)
	Round	19	20	19	20	20	19	18	20	19	19.3333
	Pointed	30	26	-	27	28	-	30	28	-	28.1667
	Collard	19	20	20	20	18	22	20	-	20	19.875
70 DAS		Block 1			Block 2			Block 3			Average (# leaves)
	Round	25	26	-	24	28	-	25	-	-	25.6
	Pointed	34	33	-	41	38	-	-	39	-	37
	Collard	24	23	-	23	25	-	23	25	-	23.8333
77 DAS		Block 1			Block 2			Block 3			Average (# leaves)
	Round	31	31	-	33	34	-	32	30	-	31.8333
	Pointed	40	40	-	42	44	-	42	-	-	41.6
	Collard	30	28	-	28	31	-	30	29	-	29.3333
84 DAS		Block 1			Block 2			Block 3			Average (# leaves)
	Round	42	36	-	40	45	-	37	-	-	40
	Pointed	-	-	-	-	-	-	54	50	-	52
	Collard	33	35	-	32	33	-	35	31	-	33.1667

## Sheet: Table S2
Supplementary Table 2. Leaf area across three B. olareacea accessions at different timepoints (days after sowing).
Leaf position: 1 oldest leaf (first leaf)
DAS	Morphotype	Biological replicate	Leaf position	Leaf Area (cm2)
28	Collard	One	1	24.17
28	Collard	One	2	66.82
28	Collard	One	3	77.18
28	Collard	One	4	66.79
28	Collard	One	5	35.08
28	Collard	One	6	8.82
28	Collard	Two	1	23.37
28	Collard	Two	2	54.33
28	Collard	Two	3	64.32
28	Collard	Two	4	46.95
28	Collard	Two	5	19.14
28	Collard	Three	1	32.33
28	Collard	Three	2	50.56
28	Collard	Three	3	47.06
28	Collard	Three	4	23.82
28	Pointed	One	1	24.08
28	Pointed	One	2	39.55
28	Pointed	One	3	62.94
28	Pointed	One	4	70.89
28	Pointed	One	5	58.64
28	Pointed	One	6	31.62
28	Pointed	One	7	11.18
28	Pointed	Two	1	20.06
28	Pointed	Two	2	32.82
28	Pointed	Two	3	57.6
28	Pointed	Two	4	51.89
28	Pointed	Two	5	40.22
28	Pointed	Two	6	17.67
28	Pointed	Three	1	17.57
28	Pointed	Three	2	28.57
28	Pointed	Three	3	50.99
28	Pointed	Three	4	52.4
28	Pointed	Three	5	31.97
28	Pointed	Three	6	12.97
28	Round	One	1	27.21
28	Round	One	2	45.33
28	Round	One	3	32.99
28	Round	One	4	16.38
28	Round	Two	1	24.43
28	Round	Two	2	43.61
28	Round	Two	3	23.83
28	Round	Two	4	12.67
28	Round	Three	1	22.86
28	Round	Three	2	36.11
28	Round	Three	3	22.89
28	Round	Three	4	11.99
35	Collard	One	1	26.12
35	Collard	One	2	75.69
35	Collard	One	3	103.25
35	Collard	One	4	131.93
35	Collard	One	5	132.21
35	Collard	One	7	125.49
35	Collard	One	8	72.06
35	Collard	One	9	23.54
35	Collard	Two	1	29.36
35	Collard	Two	2	73.66
35	Collard	Two	3	118.6
35	Collard	Two	4	131.91
35	Collard	Two	5	130.75
35	Collard	Two	7	107
35	Collard	Two	8	55.12
35	Collard	Two	9	12.65
35	Collard	Three	1	31.68
35	Collard	Three	2	75.91
35	Collard	Three	3	106.37
35	Collard	Three	4	117.75
35	Collard	Three	6	109.89
35	Collard	Three	7	79.07
35	Collard	Three	8	33.96
35	Collard	Three	9	8.35
35	Pointed	One	1	14.15
35	Pointed	One	2	44.31
35	Pointed	One	3	70.58
35	Pointed	One	4	87.68
35	Pointed	One	5	115.37
35	Pointed	One	7	105.86
35	Pointed	One	8	123.3
35	Pointed	One	9	87.97
35	Pointed	One	10	39.3
35	Pointed	One	11	10.6
35	Pointed	Two	1	18.86
35	Pointed	Two	2	36.72
35	Pointed	Two	3	87.74
35	Pointed	Two	4	94.87
35	Pointed	Two	5	97.54
35	Pointed	Two	7	119.8
35	Pointed	Two	8	90.17
35	Pointed	Two	9	59.35
35	Pointed	Two	10	19.64
35	Pointed	Three	1	9.48
35	Pointed	Three	2	26.87
35	Pointed	Three	3	52.66
35	Pointed	Three	4	95.09
35	Pointed	Three	5	106.09
35	Pointed	Three	6	140.96
35	Pointed	Three	8	158.48
35	Pointed	Three	9	133.29
35	Pointed	Three	10	4.86
35	Pointed	Three	11	87.55
35	Pointed	Three	12	33.02
35	Pointed	Three	13	10.26
35	Round	One	1	33.92
35	Round	One	2	81.01
35	Round	One	3	89.21
35	Round	One	4	107.65
35	Round	One	5	78.56
35	Round	One	6	46.39
35	Round	One	7	12.28
35	Round	Two	1	32.13
35	Round	Two	2	71.65
35	Round	Two	3	84.31
35	Round	Two	4	98.14
35	Round	Two	6	96.49
35	Round	Two	7	69.55
35	Round	Two	8	36.92
35	Round	Two	9	8.65
35	Round	Three	1	38.25
35	Round	Three	2	79.67
35	Round	Three	3	85.47
35	Round	Three	4	96.78
35	Round	Three	6	80.03
35	Round	Three	7	51.52
42	Collard	One	1	26.87
42	Collard	One	2	56.88
42	Collard	One	3	156.57
42	Collard	One	4	172.58
42	Collard	One	5	251.84
42	Collard	One	6	263.39
42	Collard	One	7	277.19
42	Collard	One	8	244.73
42	Collard	One	9	170.25
42	Collard	One	10	69.87
42	Collard	One	11	18.77
42	Collard	One	12	5.9
42	Collard	Two	1	29.69
42	Collard	Two	2	76.46
42	Collard	Two	3	140.72
42	Collard	Two	4	162.55
42	Collard	Two	5	201.63
42	Collard	Two	6	256.93
42	Collard	Two	7	290.83
42	Collard	Two	8	233.37
42	Collard	Two	9	180.06
42	Collard	Two	10	105.07
42	Collard	Two	11	38.85
42	Collard	Two	12	10.33
42	Collard	Three	1	31.83
42	Collard	Three	2	80.69
42	Collard	Three	3	140.34
42	Collard	Three	4	174.36
42	Collard	Three	5	218.71
42	Collard	Three	6	250.69
42	Collard	Three	7	240.68
42	Collard	Three	8	169.32
42	Collard	Three	9	130.72
42	Collard	Three	10	87.63
42	Collard	Three	11	34.56
42	Collard	Three	12	10.56
42	Pointed	One	1	14.55
42	Pointed	One	2	44.31
42	Pointed	One	3	88.47
42	Pointed	One	4	113.2
42	Pointed	One	5	147.89
42	Pointed	One	6	184.99
42	Pointed	One	7	203.2
42	Pointed	One	8	220.29
42	Pointed	One	9	199.72
42	Pointed	One	10	175.09
42	Pointed	One	11	114.48
42	Pointed	One	12	43.72
42	Pointed	One	13	13.87
42	Pointed	Two	1	26.87
42	Pointed	Two	2	47.42
42	Pointed	Two	3	101.01
42	Pointed	Two	4	140.94
42	Pointed	Two	5	187.78
42	Pointed	Two	6	253.27
42	Pointed	Two	7	285.02
42	Pointed	Two	8	278.34
42	Pointed	Two	9	271.85
42	Pointed	Two	10	191.74
42	Pointed	Two	11	127.26
42	Pointed	Two	12	57.1
42	Pointed	Two	13	18.96
42	Pointed	Three	1	12.19
42	Pointed	Three	2	37.33
42	Pointed	Three	3	87.41
42	Pointed	Three	4	112.54
42	Pointed	Three	5	153.65
42	Pointed	Three	6	208.17
42	Pointed	Three	7	223.65
42	Pointed	Three	8	192.8
42	Pointed	Three	9	175.52
42	Pointed	Three	10	120.53
42	Pointed	Three	11	44.37
42	Pointed	Three	12	20.28
42	Pointed	Three	13	6.36
42	Round	One	1	48.72
42	Round	One	2	96.99
42	Round	One	3	121.98
42	Round	One	4	159.48
42	Round	One	5	230.83
42	Round	One	6	238.31
42	Round	One	7	197.78
42	Round	One	8	159.29
42	Round	One	9	63.8
42	Round	One	10	24.77
42	Round	One	11	5.2
42	Round	Two	1	40.1
42	Round	Two	2	73.84
42	Round	Two	3	105.52
42	Round	Two	4	145.08
42	Round	Two	5	173.9
42	Round	Two	6	220.02
42	Round	Two	7	182.38
42	Round	Two	8	172.29
42	Round	Two	9	115.85
42	Round	Two	10	72.97
42	Round	Two	11	26.7
42	Round	Two	12	6.74
42	Round	Three	1	35.77
42	Round	Three	2	94.56
42	Round	Three	3	122.49
42	Round	Three	4	171.19
42	Round	Three	5	224.18
42	Round	Three	6	224.91
42	Round	Three	7	190.11
42	Round	Three	8	137.69
42	Round	Three	9	51.7
42	Round	Three	10	15.3
42	Round	Three	11	5.37
49	Collard	One	1	16.18
49	Collard	One	2	85.65
49	Collard	One	3	133.04
49	Collard	One	4	181.8
49	Collard	One	5	237.58
49	Collard	One	6	335.93
49	Collard	One	7	347.06
49	Collard	One	8	346.84
49	Collard	One	9	347.28
49	Collard	One	10	283.53
49	Collard	One	11	207.16
49	Collard	One	12	117.18
49	Collard	One	13	51.09
49	Collard	One	14	20.49
49	Collard	One	15	6.88
49	Collard	Two	2	92.71
49	Collard	Two	3	145.77
49	Collard	Two	4	196.99
49	Collard	Two	5	241.73
49	Collard	Two	6	356.2
49	Collard	Two	7	360.32
49	Collard	Two	8	390.52
49	Collard	Two	9	423.48
49	Collard	Two	10	344.24
49	Collard	Two	11	258.11
49	Collard	Two	12	196.03
49	Collard	Two	13	85.76
49	Collard	Two	14	38.79
49	Collard	Two	15	5.88
49	Collard	Three	1	29
49	Collard	Three	2	69.75
49	Collard	Three	3	125.1
49	Collard	Three	4	161.18
49	Collard	Three	5	206.31
49	Collard	Three	6	251.6
49	Collard	Three	7	270.25
49	Collard	Three	8	258.31
49	Collard	Three	9	230.72
49	Collard	Three	10	181.43
49	Collard	Three	11	119.9
49	Collard	Three	12	54.79
49	Collard	Three	13	10.08
49	Pointed	One	1	23.39
49	Pointed	One	2	68.39
49	Pointed	One	3	100.97
49	Pointed	One	4	156.73
49	Pointed	One	5	226.84
49	Pointed	One	6	311.21
49	Pointed	One	7	333.77
49	Pointed	One	8	326.08
49	Pointed	One	9	388.41
49	Pointed	One	10	356.29
49	Pointed	One	11	239.82
49	Pointed	One	12	131.02
49	Pointed	One	13	67.47
49	Pointed	Two	2	45.26
49	Pointed	Two	3	97.67
49	Pointed	Two	4	142.01
49	Pointed	Two	5	214.92
49	Pointed	Two	6	332.21
49	Pointed	Two	7	355.17
49	Pointed	Two	8	347.77
49	Pointed	Two	9	452.72
49	Pointed	Two	10	396.47
49	Pointed	Two	11	390.57
49	Pointed	Two	12	262.79
49	Pointed	Two	13	150.43
49	Pointed	Two	14	50.31
49	Pointed	Two	15	33.92
49	Pointed	Two	16	18.75
49	Pointed	Two	17	13.99
49	Pointed	Two	18	12.2
49	Pointed	Two	19	7.65
49	Pointed	Two	20	4.42
49	Pointed	Two	21	4.82
49	Pointed	Three	1	23.12
49	Pointed	Three	2	45.06
49	Pointed	Three	3	106.2
49	Pointed	Three	4	130.97
49	Pointed	Three	5	189.97
49	Pointed	Three	6	259.69
49	Pointed	Three	7	298.61
49	Pointed	Three	8	254.23
49	Pointed	Three	9	311.53
49	Pointed	Three	10	294.69
49	Pointed	Three	11	234.6
49	Pointed	Three	12	193.21
49	Pointed	Three	13	112.71
49	Pointed	Three	14	85.66
49	Pointed	Three	15	53.2
49	Pointed	Three	16	22.29
49	Pointed	Three	17	14.52
49	Pointed	Three	18	10.84
49	Pointed	Three	19	8.72
49	Round	One	1	50.29
49	Round	One	2	93.76
49	Round	One	3	110.26
49	Round	One	4	167.14
49	Round	One	5	221.92
49	Round	One	6	278.75
49	Round	One	7	283.13
49	Round	One	8	301.51
49	Round	One	9	268.1
49	Round	One	10	217.93
49	Round	One	11	148.4
49	Round	One	12	75.05
49	Round	One	13	20.3
49	Round	One	14	9.29
49	Round	Two	1	49.31
49	Round	Two	2	100.92
49	Round	Two	3	115.1
49	Round	Two	4	182.09
49	Round	Two	5	224.7
49	Round	Two	6	314.05
49	Round	Two	7	350.76
49	Round	Two	8	411.2
49	Round	Two	9	318.72
49	Round	Two	10	273.34
49	Round	Two	11	184.97
49	Round	Two	12	105.54
49	Round	Two	13	49.04
49	Round	Two	14	13.05
49	Round	Three	1	56.51
49	Round	Three	2	99.13
49	Round	Three	3	129.25
49	Round	Three	4	188.32
49	Round	Three	5	288.63
49	Round	Three	6	364.6
49	Round	Three	7	409.72
49	Round	Three	8	430.81
49	Round	Three	9	364.27
49	Round	Three	10	325.58
49	Round	Three	11	253.45
49	Round	Three	12	115.01
49	Round	Three	13	62.27
49	Round	Three	14	19.8
49	Round	Three	15	5.97
49	Round	Three	16	3.96
56	Collard	One	2	93.59
56	Collard	One	3	135.98
56	Collard	One	4	182.17
56	Collard	One	5	209.91
56	Collard	One	6	323.31
56	Collard	One	7	362.32
56	Collard	One	8	337.85
56	Collard	One	9	372.12
56	Collard	One	10	338.59
56	Collard	One	11	301.77
56	Collard	One	12	317.5
56	Collard	One	13	268.08
56	Collard	One	14	214.46
56	Collard	One	15	5.88
56	Collard	One	16	163.94
56	Collard	One	17	75.39
56	Collard	One	18	37.71
56	Collard	One	19	15.19
56	Collard	Two	2	81.98
56	Collard	Two	3	128.4
56	Collard	Two	4	158.13
56	Collard	Two	5	194.21
56	Collard	Two	6	255.79
56	Collard	Two	7	276.75
56	Collard	Two	8	289.93
56	Collard	Two	9	313.46
56	Collard	Two	10	254.43
56	Collard	Two	11	280.88
56	Collard	Two	12	246.33
56	Collard	Two	13	185.84
56	Collard	Two	14	124.94
56	Collard	Two	15	50.75
56	Collard	Two	16	14.61
56	Collard	Three	2	51.17
56	Collard	Three	3	87.56
56	Collard	Three	4	124.58
56	Collard	Three	5	157.53
56	Collard	Three	6	232.29
56	Collard	Three	7	282.64
56	Collard	Three	8	321.21
56	Collard	Three	9	344.46
56	Collard	Three	10	306.26
56	Collard	Three	11	318.02
56	Collard	Three	12	331.96
56	Collard	Three	13	278.8
56	Collard	Three	14	249.35
56	Collard	Three	15	202.51
56	Collard	Three	16	121.73
56	Collard	Three	17	63.23
56	Collard	Three	18	22.86
56	Collard	Three	19	9.16
56	Pointed	One	3	102.22
56	Pointed	One	4	140.1
56	Pointed	One	5	200.61
56	Pointed	One	6	319.5
56	Pointed	One	7	360.33
56	Pointed	One	8	367.72
56	Pointed	One	9	364.87
56	Pointed	One	10	440.49
56	Pointed	One	11	421.03
56	Pointed	One	12	346.45
56	Pointed	One	13	253.47
56	Pointed	One	14	142.48
56	Pointed	One	15	132.39
56	Pointed	One	16	83.9
56	Pointed	One	17	41.57
56	Pointed	One	18	44.2
56	Pointed	One	19	36.78
56	Pointed	One	20	31.44
56	Pointed	One	21	25.14
56	Pointed	One	22	8.47
56	Pointed	Two	3	57.69
56	Pointed	Two	4	92.46
56	Pointed	Two	5	139.93
56	Pointed	Two	6	173.92
56	Pointed	Two	7	292.16
56	Pointed	Two	8	307.1
56	Pointed	Two	9	343.1
56	Pointed	Two	10	367.99
56	Pointed	Two	11	365.3
56	Pointed	Two	12	360.31
56	Pointed	Two	13	306.72
56	Pointed	Two	14	262.71
56	Pointed	Two	15	189.94
56	Pointed	Two	16	161.55
56	Pointed	Two	17	113.09
56	Pointed	Two	18	57.88
56	Pointed	Two	19	35.33
56	Pointed	Two	20	25.11
56	Pointed	Two	21	19.27
56	Pointed	Two	22	14.46
56	Pointed	Two	23	7.72
56	Pointed	Three	2	32.61
56	Pointed	Three	3	78
56	Pointed	Three	4	108.95
56	Pointed	Three	5	167.04
56	Pointed	Three	6	203.68
56	Pointed	Three	7	242.14
56	Pointed	Three	8	269.53
56	Pointed	Three	9	288.91
56	Pointed	Three	10	270.48
56	Pointed	Three	11	267.81
56	Pointed	Three	12	273.92
56	Pointed	Three	13	239.26
56	Pointed	Three	14	204.25
56	Pointed	Three	15	139.53
56	Pointed	Three	16	119.77
56	Pointed	Three	17	80.18
56	Pointed	Three	18	55.36
56	Pointed	Three	19	40.64
56	Round	One	1	41.78
56	Round	One	2	93.21
56	Round	One	3	130.45
56	Round	One	4	182.34
56	Round	One	5	236.87
56	Round	One	6	312.65
56	Round	One	7	343.78
56	Round	One	8	350.14
56	Round	One	9	337.25
56	Round	One	10	318.67
56	Round	One	11	333.63
56	Round	One	12	304.98
56	Round	One	13	244.98
56	Round	One	14	197.62
56	Round	One	15	111.48
56	Round	One	16	59.18
56	Round	One	17	13.59
56	Round	One	18	5.44
56	Round	Two	1	41.82
56	Round	Two	2	90.62
56	Round	Two	3	112.5
56	Round	Two	4	181.05
56	Round	Two	5	233.95
56	Round	Two	6	337.84
56	Round	Two	7	387.43
56	Round	Two	8	423.26
56	Round	Two	9	427.03
56	Round	Two	10	462.25
56	Round	Two	11	420.2
56	Round	Two	12	362.67
56	Round	Two	13	279.13
56	Round	Two	14	210.59
56	Round	Two	15	120.6
56	Round	Two	16	70.55
56	Round	Two	17	39.56
56	Round	Two	18	16.58
56	Round	Two	19	8.69
56	Round	Three	1	36.62
56	Round	Three	2	89.31
56	Round	Three	3	106.43
56	Round	Three	4	147.79
56	Round	Three	5	202.37
56	Round	Three	6	240.48
56	Round	Three	7	294.72
56	Round	Three	8	253.26
56	Round	Three	9	306.99
56	Round	Three	10	246.65
56	Round	Three	11	220.97
56	Round	Three	12	191.8
56	Round	Three	13	131.42
56	Round	Three	14	77.76
56	Round	Three	15	48.05
56	Round	Three	16	19.74
56	Round	Three	17	7.3
63	Collard	One	3	170.18
63	Collard	One	4	192.24
63	Collard	One	5	250.34
63	Collard	One	6	349.29
63	Collard	One	7	391.07
63	Collard	One	8	364.71
63	Collard	One	9	438.87
63	Collard	One	10	400.44
63	Collard	One	11	423.99
63	Collard	One	12	431.14
63	Collard	One	13	364.04
63	Collard	One	14	381.5
63	Collard	One	15	377.65
63	Collard	One	16	310.31
63	Collard	One	17	250.86
63	Collard	One	18	186.19
63	Collard	One	19	168.98
63	Collard	One	20	109.73
63	Collard	One	21	55.94
63	Collard	One	22	27.83
63	Collard	One	23	12.91
63	Collard	One	24	6.3
63	Collard	Two	3	103.65
63	Collard	Two	4	140.02
63	Collard	Two	5	195.52
63	Collard	Two	6	239
63	Collard	Two	7	364.91
63	Collard	Two	8	398.37
63	Collard	Two	9	386.72
63	Collard	Two	10	431.65
63	Collard	Two	11	384.86
63	Collard	Two	12	407.67
63	Collard	Two	13	431.07
63	Collard	Two	14	447.75
63	Collard	Two	15	395.84
63	Collard	Two	16	349.4
63	Collard	Two	17	304.28
63	Collard	Two	18	249.99
63	Collard	Two	19	185.2
63	Collard	Two	20	114.68
63	Collard	Two	21	78.07
63	Collard	Two	22	32.6
63	Collard	Two	23	14.78
63	Collard	Two	24	7.58
63	Collard	Three	3	147.37
63	Collard	Three	4	178.42
63	Collard	Three	5	266.71
63	Collard	Three	6	354.36
63	Collard	Three	7	433.72
63	Collard	Three	8	435.95
63	Collard	Three	9	461.24
63	Collard	Three	10	440.91
63	Collard	Three	11	503.49
63	Collard	Three	12	497.34
63	Collard	Three	13	493.52
63	Collard	Three	14	418.92
63	Collard	Three	15	404.98
63	Collard	Three	16	365.75
63	Collard	Three	17	256.68
63	Collard	Three	18	249.01
63	Collard	Three	19	134.34
63	Collard	Three	20	80.48
63	Collard	Three	21	43.01
63	Collard	Three	22	11.9
63	Collard	Three	23	9.28
63	Pointed	One	3	111.59
63	Pointed	One	4	140.22
63	Pointed	One	5	199.9
63	Pointed	One	6	263.18
63	Pointed	One	7	350.88
63	Pointed	One	8	387.04
63	Pointed	One	9	377.85
63	Pointed	One	10	367.13
63	Pointed	One	11	335.45
63	Pointed	One	12	339.12
63	Pointed	One	13	338.07
63	Pointed	One	14	315.16
63	Pointed	One	15	304.46
63	Pointed	One	16	252.18
63	Pointed	One	17	221.62
63	Pointed	One	18	209.41
63	Pointed	One	19	123.58
63	Pointed	One	20	64.19
63	Pointed	One	21	61.18
63	Pointed	Two	3	104.43
63	Pointed	Two	4	137.87
63	Pointed	Two	5	231.05
63	Pointed	Two	6	297.89
63	Pointed	Two	7	409.31
63	Pointed	Two	8	474.71
63	Pointed	Two	9	450.21
63	Pointed	Two	10	569.77
63	Pointed	Two	11	458.5
63	Pointed	Two	12	500.9
63	Pointed	Two	13	326.72
63	Pointed	Three	3	102.58
63	Pointed	Three	4	140.58
63	Pointed	Three	5	241
63	Pointed	Three	6	295.58
63	Pointed	Three	7	363.54
63	Pointed	Three	8	397.2
63	Pointed	Three	9	435.08
63	Pointed	Three	10	473.24
63	Pointed	Three	11	506.4
63	Pointed	Three	12	473.92
63	Pointed	Three	13	440.02
63	Pointed	Three	14	295.89
63	Pointed	Three	15	210.96
63	Round	One	1	35.43
63	Round	One	2	69.7
63	Round	One	3	105
63	Round	One	4	152.6
63	Round	One	5	242.51
63	Round	One	6	314.78
63	Round	One	7	346.41
63	Round	One	8	384.46
63	Round	One	9	383.39
63	Round	One	10	435.13
63	Round	One	11	391.59
63	Round	One	12	411.49
63	Round	One	13	361.41
63	Round	One	14	292.06
63	Round	One	15	260.99
63	Round	One	16	185.26
63	Round	One	17	131.39
63	Round	One	18	59.51
63	Round	One	19	11.96
63	Round	One	20	8.35
63	Round	One	21	6.17
63	Round	Two	2	86.54
63	Round	Two	3	124.41
63	Round	Two	4	170.42
63	Round	Two	5	287.89
63	Round	Two	6	295.68
63	Round	Two	7	339.76
63	Round	Two	8	432.91
63	Round	Two	9	490.59
63	Round	Two	10	460.73
63	Round	Two	11	438.77
63	Round	Two	12	410.31
63	Round	Two	13	376.1
63	Round	Two	14	429.48
63	Round	Two	15	355.3
63	Round	Two	16	311.26
63	Round	Two	17	259.17
63	Round	Two	18	204.49
63	Round	Two	19	124.69
63	Round	Two	20	67.55
63	Round	Two	21	30.52
63	Round	Two	22	22.91
63	Round	Two	23	11.04
63	Round	Two	24	9.12
63	Round	Two	25	6.47
63	Round	Three	2	83.28
63	Round	Three	3	123
63	Round	Three	4	171.99
63	Round	Three	5	221.87
63	Round	Three	6	317.3
63	Round	Three	7	385.66
63	Round	Three	8	415.75
63	Round	Three	9	436.11
63	Round	Three	10	412.34
63	Round	Three	11	451.76
63	Round	Three	12	456.88
63	Round	Three	13	400.51
63	Round	Three	14	373.6
63	Round	Three	15	302.18
63	Round	Three	16	220.48
63	Round	Three	17	185.24
63	Round	Three	18	124.05
63	Round	Three	19	81.62
63	Round	Three	20	45.84
63	Round	Three	21	23.16
63	Round	Three	22	13.2
63	Round	Three	23	8.51
70	Collard	One	3	128.78
70	Collard	One	4	178.35
70	Collard	One	5	245.92
70	Collard	One	6	328.05
70	Collard	One	7	348.91
70	Collard	One	8	346.12
70	Collard	One	9	390.23
70	Collard	One	10	355.15
70	Collard	One	11	408.18
70	Collard	One	12	412.27
70	Collard	One	13	413.71
70	Collard	One	14	408.99
70	Collard	One	15	430.76
70	Collard	One	16	413.3
70	Collard	One	17	351.92
70	Collard	One	18	328.24
70	Collard	One	19	266.86
70	Collard	One	20	206.28
70	Collard	One	21	183.01
70	Collard	One	22	116.61
70	Collard	One	23	75.56
70	Collard	One	24	34.85
70	Collard	One	25	14.53
70	Collard	Two	3	144.69
70	Collard	Two	4	184.14
70	Collard	Two	5	227.47
70	Collard	Two	6	308.27
70	Collard	Two	7	395.45
70	Collard	Two	8	393.65
70	Collard	Two	9	460.05
70	Collard	Two	10	461.09
70	Collard	Two	11	481.76
70	Collard	Two	12	543.73
70	Collard	Two	13	524.11
70	Collard	Two	14	514.83
70	Collard	Two	15	501.3
70	Collard	Two	16	393.09
70	Collard	Two	17	402.68
70	Collard	Two	18	396.45
70	Collard	Two	19	313.77
70	Collard	Two	20	318.13
70	Collard	Two	21	260.11
70	Collard	Two	22	197.29
70	Collard	Two	23	141.14
70	Collard	Two	24	61.15
70	Collard	Two	25	40.44
70	Collard	Two	26	18.84
70	Collard	Two	27	9.62
70	Collard	Three	3	163.55
70	Collard	Three	4	206.35
70	Collard	Three	5	298.16
70	Collard	Three	6	367.79
70	Collard	Three	7	430.84
70	Collard	Three	8	466.88
70	Collard	Three	9	479.41
70	Collard	Three	10	441
70	Collard	Three	11	494.83
70	Collard	Three	12	489.48
70	Collard	Three	13	492.94
70	Collard	Three	14	523.03
70	Collard	Three	15	467.19
70	Collard	Three	16	445.13
70	Collard	Three	17	374.58
70	Collard	Three	18	338.93
70	Collard	Three	19	306.66
70	Collard	Three	20	276.19
70	Collard	Three	21	198.95
70	Collard	Three	22	132.1
70	Collard	Three	23	88.13
70	Collard	Three	24	32.65
70	Collard	Three	25	26.12
70	Collard	Three	26	12.65
70	Pointed	One	3	94.51
70	Pointed	One	4	143.52
70	Pointed	One	5	211.02
70	Pointed	One	6	264.62
70	Pointed	One	7	319.01
70	Pointed	One	8	331.51
70	Pointed	One	9	413.34
70	Pointed	One	10	519.14
70	Pointed	One	11	458.68
70	Pointed	One	12	480.85
70	Pointed	One	13	411.44
70	Pointed	One	14	314.31
70	Pointed	One	15	201.47
70	Pointed	One	16	178.3
70	Pointed	One	17	145.4
70	Pointed	One	18	127.36
70	Pointed	Two	3	75.51
70	Pointed	Two	4	125.59
70	Pointed	Two	5	207.27
70	Pointed	Two	6	315.39
70	Pointed	Two	7	395.65
70	Pointed	Two	8	459.29
70	Pointed	Two	9	468.26
70	Pointed	Two	10	482.3
70	Pointed	Two	11	598.3
70	Pointed	Two	12	503
70	Pointed	Two	13	476.94
70	Pointed	Two	14	297.23
70	Pointed	Two	15	228.59
70	Pointed	Three	3	84.88
70	Pointed	Three	4	128.3
70	Pointed	Three	5	182.91
70	Pointed	Three	6	257.38
70	Pointed	Three	7	340.18
70	Pointed	Three	8	403.2
70	Pointed	Three	9	451.54
70	Pointed	Three	10	356.47
70	Pointed	Three	11	413.76
70	Pointed	Three	12	414.61
70	Pointed	Three	13	433.53
70	Pointed	Three	14	460.17
70	Pointed	Three	15	404.3
70	Pointed	Three	16	222.41
70	Pointed	Three	17	134.8
70	Pointed	Three	18	109.77
70	Pointed	Three	19	114.69
70	Round	One	3	105.97
70	Round	One	4	201.37
70	Round	One	5	264.34
70	Round	One	6	304.14
70	Round	One	7	379.76
70	Round	One	8	409.81
70	Round	One	9	414.59
70	Round	One	10	463.85
70	Round	One	11	460.52
70	Round	One	12	428.14
70	Round	One	13	413.01
70	Round	One	14	421.87
70	Round	One	15	392.59
70	Round	One	16	359.62
70	Round	One	17	347.2
70	Round	One	18	284.32
70	Round	One	19	236.53
70	Round	One	20	139.25
70	Round	One	21	80.99
70	Round	One	22	44.73
70	Round	One	23	30.81
70	Round	One	24	26.72
70	Round	One	26	16.43
70	Round	One	27	15.8
70	Round	One	28	11.81
70	Round	Two	2	67.67
70	Round	Two	3	106.33
70	Round	Two	4	168
70	Round	Two	5	244.55
70	Round	Two	6	325.07
70	Round	Two	7	329.59
70	Round	Two	8	423.34
70	Round	Two	9	437.64
70	Round	Two	10	471.83
70	Round	Two	11	455.72
70	Round	Two	12	420.56
70	Round	Two	13	408.78
70	Round	Two	14	395.56
70	Round	Two	15	338.07
70	Round	Two	16	304.06
70	Round	Two	17	268.85
70	Round	Two	18	263.73
70	Round	Two	19	201.12
70	Round	Two	20	151.6
70	Round	Two	21	118.33
70	Round	Two	22	53.96
70	Round	Two	23	48.12
70	Round	Two	24	35.05
70	Round	Three	3	156.36
70	Round	Three	4	202.7
70	Round	Three	5	287.52
70	Round	Three	6	355.09
70	Round	Three	7	421.29
70	Round	Three	8	479.13
70	Round	Three	9	412.89
70	Round	Three	10	430
70	Round	Three	11	389.51
70	Round	Three	12	449.79
70	Round	Three	13	455.64
70	Round	Three	14	389.16
70	Round	Three	15	376.4
70	Round	Three	16	358.26
70	Round	Three	17	245.5
70	Round	Three	18	223.33
70	Round	Three	19	178.52
70	Round	Three	20	87.25
70	Round	Three	21	63.53
70	Round	Three	22	29.12
70	Round	Three	23	21.52
70	Round	Three	24	19.87
77	Collard	One	5	262.87
77	Collard	One	6	370.78
77	Collard	One	7	424.84
77	Collard	One	8	528.1
77	Collard	One	9	523.37
77	Collard	One	10	553.52
77	Collard	One	11	502.4
77	Collard	One	12	517.34
77	Collard	One	13	488.18
77	Collard	One	14	556.68
77	Collard	One	15	529.39
77	Collard	One	16	498.86
77	Collard	One	17	460.68
77	Collard	One	18	462.54
77	Collard	One	19	425.08
77	Collard	One	20	404.26
77	Collard	One	21	431.73
77	Collard	One	22	433.7
77	Collard	One	23	395.1
77	Collard	One	24	381.98
77	Collard	One	25	289.34
77	Collard	One	26	238.32
77	Collard	One	27	175.59
77	Collard	One	28	107.18
77	Collard	One	29	53.02
77	Collard	One	30	33.31
77	Collard	One	31	22.43
77	Collard	One	32	13.83
77	Collard	One	33	8.67
77	Collard	Two	5	214.99
77	Collard	Two	6	284.97
77	Collard	Two	7	349.25
77	Collard	Two	8	395.06
77	Collard	Two	9	423.57
77	Collard	Two	10	428.45
77	Collard	Two	11	407.9
77	Collard	Two	12	440.43
77	Collard	Two	13	436.06
77	Collard	Two	14	423.11
77	Collard	Two	15	454.68
77	Collard	Two	16	404.52
77	Collard	Two	17	381.88
77	Collard	Two	18	397.03
77	Collard	Two	19	382.08
77	Collard	Two	20	395.05
77	Collard	Two	21	404.07
77	Collard	Two	22	410.51
77	Collard	Two	23	373.29
77	Collard	Two	24	289.23
77	Collard	Two	25	245.38
77	Collard	Two	26	185.06
77	Collard	Two	27	101.26
77	Collard	Two	28	113.92
77	Collard	Two	29	44.57
77	Collard	Two	30	29.12
77	Collard	Three	4	168.55
77	Collard	Three	5	266.26
77	Collard	Three	6	345.19
77	Collard	Three	7	347.08
77	Collard	Three	8	392.42
77	Collard	Three	9	407.64
77	Collard	Three	10	410.67
77	Collard	Three	11	446.39
77	Collard	Three	12	481.06
77	Collard	Three	13	455.44
77	Collard	Three	14	434.57
77	Collard	Three	15	421.42
77	Collard	Three	16	366.31
77	Collard	Three	17	396.86
77	Collard	Three	18	395.52
77	Collard	Three	19	342.17
77	Collard	Three	20	360.05
77	Collard	Three	21	299.43
77	Collard	Three	22	266.66
77	Collard	Three	23	224.98
77	Collard	Three	24	140.17
77	Collard	Three	25	88.88
77	Collard	Three	26	56.14
77	Collard	Three	27	31.93
77	Pointed	One	3	79.09
77	Pointed	One	4	121.15
77	Pointed	One	5	184.74
77	Pointed	One	6	257.13
77	Pointed	One	7	319.26
77	Pointed	One	8	327.37
77	Pointed	One	9	384.25
77	Pointed	One	10	415.12
77	Pointed	One	11	445.43
77	Pointed	One	12	484.26
77	Pointed	One	13	395.14
77	Pointed	One	14	381.81
77	Pointed	One	15	282.23
77	Pointed	One	16	271.67
77	Pointed	One	17	196.62
77	Pointed	One	18	117.25
77	Pointed	One	19	107.07
77	Pointed	One	20	103.74
77	Pointed	Two	4	129.59
77	Pointed	Two	5	170.75
77	Pointed	Two	6	237.36
77	Pointed	Two	7	312.18
77	Pointed	Two	8	332.06
77	Pointed	Two	9	376.54
77	Pointed	Two	10	406.86
77	Pointed	Two	11	363.91
77	Pointed	Two	12	452.85
77	Pointed	Two	13	461.93
77	Pointed	Two	14	463.61
77	Pointed	Three	4	142.21
77	Pointed	Three	5	227.87
77	Pointed	Three	6	328.24
77	Pointed	Three	7	377.89
77	Pointed	Three	8	467.87
77	Pointed	Three	9	428.35
77	Pointed	Three	10	460.88
77	Pointed	Three	11	441.01
77	Pointed	Three	12	317.69
77	Pointed	Three	13	313.23
77	Pointed	Three	14	376.82
77	Pointed	Three	15	364.17
77	Pointed	Three	16	265.73
77	Pointed	Three	17	162.47
77	Pointed	Three	18	128.81
77	Pointed	Three	19	135.11
77	Pointed	Three	20	112.84
77	Round	One	3	106.71
77	Round	One	4	204.9
77	Round	One	5	289.03
77	Round	One	6	450.53
77	Round	One	7	461.38
77	Round	One	8	360.18
77	Round	One	9	481.51
77	Round	One	10	486.06
77	Round	One	11	439.76
77	Round	One	12	464.64
77	Round	One	13	416.45
77	Round	One	14	434.34
77	Round	One	15	416.69
77	Round	One	16	377.09
77	Round	One	17	387.34
77	Round	One	18	354.4
77	Round	One	19	354.74
77	Round	One	20	288.86
77	Round	One	21	213.35
77	Round	One	22	111.86
77	Round	One	23	78.71
77	Round	One	24	54.04
77	Round	Two	4	182.97
77	Round	Two	5	268.56
77	Round	Two	6	335.75
77	Round	Two	7	395.88
77	Round	Two	8	469.63
77	Round	Two	9	474.23
77	Round	Two	10	486.48
77	Round	Two	11	467.01
77	Round	Two	12	469.82
77	Round	Two	13	505.48
77	Round	Two	14	460.65
77	Round	Two	15	482.1
77	Round	Two	16	472.35
77	Round	Two	17	382.14
77	Round	Two	18	419.74
77	Round	Two	19	396.06
77	Round	Two	20	322.24
77	Round	Two	21	291.21
77	Round	Two	22	195.28
77	Round	Two	23	159.43
77	Round	Two	24	88.22
77	Round	Two	25	112.97
77	Round	Three	3	104.33
77	Round	Three	4	172.71
77	Round	Three	5	205.82
77	Round	Three	6	279.26
77	Round	Three	7	311.04
77	Round	Three	8	403.12
77	Round	Three	9	389.53
77	Round	Three	10	465.98
77	Round	Three	11	378.3
77	Round	Three	12	417.58
77	Round	Three	13	441.91
77	Round	Three	14	472.88
77	Round	Three	15	434.13
77	Round	Three	16	372.53
77	Round	Three	17	366.79
77	Round	Three	18	355.61
77	Round	Three	19	337.41
77	Round	Three	20	286.76
77	Round	Three	21	279.55
77	Round	Three	22	183.19
77	Round	Three	23	119.6
77	Round	Three	24	73.35
77	Round	Three	25	44.96
77	Round	Three	26	46.65

## Sheet: Table S3
Supplementary Table 3. Curvature ratio of pointed and round cabbage leaves at 70 DAS (days after sowing).
Leaf position: 1 oldest leaf (first leaf)
Curvature side: Down-curvature = -1; Flat = 0; Upward-curvature = 1
			Proximo-distal axis			Lateral axis			Leaf curvature ratio
Morphotype	Plant	Leaf Position	Straight line distance (cm)	Curved line distance (cm)	Curvature side	Straight line distance (cm)	Curved line distance (cm)	Curvature side	Proximo-distal axis	Lateral axis
Pointed	1	5	24	26	-1	8.5	16.5	-1	0.923077	0.515152
		6	25	26.5	-1	16	17.2	-1	0.943396	0.930233
		7	27	28.6	-1	13.4	18.7	-1	0.944056	0.716578
		8	24.5	27	-1	14	19.4	-1	0.907407	0.721649
		9	28	28.3	-1	20.9	22.3	-1	0.989399	0.93722
		10	30	31.7	-1	22.5	24.6	-1	0.946372	0.914634
		11	26.8	27.4	-1	23.5	25.2	-1	0.978102	0.93254
		12	28	28.8	0	22.5	23.9	0	0.972222	0.941423
		14	20.8	22	1	18.5	20.1	1	1.05769	1.08649
	2	4	21	22	-1	7.4	12.8	-1	0.954545	0.578125
		5	22.7	24.5	-1	15.1	16.8	-1	0.926531	0.89881
		6	28	28.6	-1	11.5	19	-1	0.979021	0.605263
		7	27.5	28.5	-1	17.5	21	-1	0.964912	0.833333
		8	30	31	-1	16.5	22.5	-1	0.967742	0.733333
		9	29	29.5	-1	22	22.5	-1	0.983051	0.977778
		10	28	31	-1	17.5	23.4	-1	0.903226	0.747863
		11	31.2	32	-1	24	25.6	-1	0.975	0.9375
		12	28.4	29	-1	22.5	24.4	-1	0.97931	0.922131
		14	17.5	18	1	17.5	21	1	1.02857	1.2
		15	18.7	19	1	0	0	0	1.01604	-
	3	3	14.4	16.9	-1	8.5	9.5	-1	0.852071	0.894737
		4	19	20.3	-1	11.2	12.2	-1	0.935961	0.918033
		5	22	22.6	-1	14.2	15.9	-1	0.973451	0.893082
		6	23	24.5	-1	15	17.7	-1	0.938776	0.847458
		7	24.5	27	-1	17	20	-1	0.907407	0.85
		8	28	28.9	-1	18.5	21.3	-1	0.968858	0.868545
		9	28	28.8	-1	21	22.2	-1	0.972222	0.945946
		10	24.6	26	-1	17.3	19.9	-1	0.946154	0.869347
		11	25.5	27	-1	21.5	22.4	-1	0.944444	0.959821
		12	26	26.5	-1	20.5	21	-1	0.981132	0.97619
		13	25.7	26	-1	22.3	23	-1	0.988462	0.969565
		14	26.2	26.5	-1	23.8	23.9	-1	0.988679	0.995816
		15	24.1	24.3	-1	22.4	22.6	-1	0.99177	0.99115
		16	19.2	19.7	1	13.9	14.2	1	1.02604	1.02158
		17	11.8	13	1	12.9	15.4	1	1.10169	1.1938
		18	11.3	11.6	1	13.5	14.2	1	1.02655	1.05185
		19	12.5	12.9	1	12.1	13.4	1	1.032	1.10744
Round	1	4	13	15.4	-1	15.2	16	-1	0.844156	0.95
		5	16.8	18.2	-1	17.3	19.7	-1	0.923077	0.878173
		6	19.5	20.8	-1	16.6	18.9	-1	0.9375	0.878307
		7	16.6	17.1	-1	18.5	21.6	-1	0.97076	0.856481
		8	18.4	19.7	-1	18.9	20.5	-1	0.93401	0.921951
		9	20.9	21.1	-1	21.3	23.1	-1	0.990521	0.922078
		10	21.9	22.8	-1	24.3	25	-1	0.960526	0.972
		11	22.2	22.3	-1	23.6	24.5	-1	0.995516	0.963265
		12	0	0	0	22.5	23	1	-	0.978261
		13	23.1	23.2	-1	23.5	24.3	1	0.99569	0.967078
		15	27.4	27.9	1	20.5	23.5	1	1.01825	1.14634
		16	25.3	26.2	1	21.7	22	1	1.03557	1.01382
		17	24	24.6	1	21.9	23	1	1.025	1.05023
		18	21.1	21.1	1	18.4	21.6	1	1	1.17391
		19	16.6	18.5	1	17.4	18.7	1	1.11446	1.07471
		20	13.2	13.8	1	11	14.9	1	1.04545	1.35455
		21	8.9	10.4	1	7.9	11.3	1	1.16854	1.43038
		22	7	8.3	1	6.3	8.2	1	1.18571	1.30159
		23	5.6	6.9	1	4.3	6.6	1	1.23214	1.53488
	2	4	13.4	15.4	-1	14.6	14.9	-1	0.87013	0.979866
		5	17	17.8	-1	16.4	17.6	-1	0.955056	0.931818
		6	19.3	19.7	-1	18.4	20	-1	0.979695	0.92
		7	18.7	18.9	-1	19.9	20.9	-1	0.989418	0.952153
		8	20.9	21	-1	20	23.3	-1	0.995238	0.858369
		9	22.6	22.8	-1	22.5	24	-1	0.991228	0.9375
		10	25	25.8	-1	23.4	25.4	-1	0.968992	0.92126
		11	23.3	24.9	1	23.3	24.3	-1	1.06867	1.04292
		12	30.6	31	1	24.2	24.8	1	1.01307	1.02479
		13	0	0	0	23.8	24.5	1	-	0.971429
		14	26.1	26.7	1	23.3	23.8	1	1.02299	1.02146
		15	23.5	24.2	1	21	22	1	1.02979	1.04762
		16	22.6	23.4	1	18.4	21.6	1	1.0354	1.17391
		17	20.3	20.9	1	18	20.2	1	1.02956	1.12222
		18	19.1	20	1	16.9	20.1	1	1.04712	1.18935
		19	16.4	17.1	1	11.6	17.8	1	1.04268	1.53448
		20	14.2	14.6	1	13.7	15.7	1	1.02817	1.14599
		21	11.3	12.2	1	10	13.6	1	1.07965	1.36
		22	7.4	8.1	1	3.7	8.3	1	1.09459	2.24324
		23	6.2	7.7	1	5.3	7.1	1	1.24194	1.33962
	3	3	11.2	15	-1	13.1	14.1	-1	0.746667	0.929078
		4	10.6	15.9	-1	14.1	16.2	-1	0.666667	0.87037
		5	19.5	22.3	-1	14.4	18.2	-1	0.874439	0.791209
		6	21.6	21.9	-1	18.3	20.6	-1	0.986301	0.88835
		7	0	0	-1	21.2	23.6	-1	-	0.898305
		8	20.1	21.3	-1	21.5	25	-1	0.943662	0.86
		9	21.9	23	-1	21.5	23.4	-1	0.952174	0.918803
		10	23.1	23.6	-1	23.1	24.2	-1	0.978814	0.954545
		11	0	0	0	23	23.7	-1	-	0.970464
		14	26.8	27	1	23.5	24	1	1.00746	1.02128
		15	24.2	24.6	1	22.6	24.6	1	1.01653	1.0885
		16	23.7	24.1	1	22	22.8	1	1.01688	1.03636
		17	19.2	20	1	18.4	21	1	1.04167	1.1413
		18	17.2	17.4	1	18	18.7	1	1.01163	1.03889
		19	15	15	0	15.7	17.1	1	1	0.918129
		20	10.9	11	1	9.7	11.4	1	1.00917	1.17526
		21	8.5	9	1	7.4	9.7	1	1.05882	1.31081

## Sheet: Table S4
Supplementary Table 4. Leaf shape analysis.
Genotype	Vegetative Stage	Timepoint (days after sowing)	Replicate	Leaf area (cm2)	Leaf width (cm)	Leaf length (cm)	a (cm)	b (cm)	Leaf index	Leaf shape index
Round	Seedling	29	1	10.345	3.513	4.023	2.485	1.538	1.14518	1.61573
Round	Seedling	29	2	18.829	4.541	5.228	2.653	2.575	1.15129	1.03029
Round	Seedling	29	3	23.988	5.215	6.126	3.286	2.84	1.17469	1.15704
Round	Seedling	36	1	88.203	10.372	11.03	7.239	3.791	1.06344	1.90952
Round	Seedling	36	2	154.723	12.917	15.022	9.454	5.568	1.16296	1.69792
Round	Seedling	36	3	184.58	14.348	16.188	10.084	6.104	1.12824	1.65203
Round	Seedling	43	1	274.648	18.376	18.248	10.647	7.601	0.993034	1.40074
Round	Seedling	43	2	240.125	16.696	17.562	9.603	7.959	1.05187	1.20656
Round	Seedling	43	3	244.838	16.725	18.208	11.061	7.147	1.08867	1.54764
Round	Seedling	50	1	359.245	21.057	21.521	12.992	8.529	1.02204	1.52327
Round	Seedling	50	2	260.805	17.311	18.708	10.166	8.542	1.0807	1.19012
Round	Seedling	50	3	262.642	17.041	18.6	11.565	7.035	1.09149	1.64392
Round	Rosette	57	1	32.814	6.771	6.4	2.939	3.461	0.945208	0.849177
Round	Rosette	57	2	41.21	7.217	7.371	3.377	3.994	1.02134	0.845518
Round	Rosette	57	3	47.472	7.441	8.31	3.988	4.322	1.11679	0.922721
Round	Rosette	64	1	141.368	14.292	14.144	6.496	7.648	0.989645	0.849372
Round	Rosette	64	2	148.94	14.105	14.02	6.371	7.649	0.993974	0.832919
Round	Rosette	64	3	159.242	14.104	13.2505	6.734	6.5165	0.939485	1.03338
Round	Rosette	71	1	298.506	20.086	20.102	9.28	10.822	1.0008	0.857512
Round	Rosette	71	2	264.736	19.029	18.651	7.489	11.162	0.980136	0.670937
Round	Rosette	71	3	294.893	19.32	20.633	9.308	11.325	1.06796	0.821898
Round	Rosette	78	1	387.749	23.746	22.548	9.725	12.823	0.949549	0.758403
Round	Rosette	78	2	328.287	20.752	21.76	9.307	12.453	1.04857	0.74737
Round	Rosette	78	3	369.251	21.943	22.109	11.549	10.56	1.00757	1.09366
Round	Rosette	85	1	412.57	23.568	23.043	10.489	12.554	0.977724	0.835511
Round	Rosette	85	2	345.164	21.347	20.992	9.185	11.807	0.98337	0.777928
Round	Rosette	85	3	394.888	22.971	23.185	12.519	10.666	1.00932	1.17373
Round	Rosette	92	1	435.543	24.683	23.206	11.057	12.149	0.940161	0.910116
Round	Rosette	92	2	357.607	22.021	21.518	8.529	12.989	0.977158	0.656633
Round	Rosette	92	3	401.665	22.998	23.286	11.377	11.909	1.01252	0.955328
Pointed	Seedling	29	1	66.302	8.419	10.458	7.134	3.324	1.24219	2.14621
Pointed	Seedling	29	2	68.454	8.702	10.434	6.409	4.025	1.19903	1.5923
Pointed	Seedling	29	3	69.148	8.574	10.234	6.385	3.849	1.19361	1.65887
Pointed	Seedling	36	1	194.185	14.32	17.493	9.736	7.757	1.22158	1.25512
Pointed	Seedling	36	2	191.383	14.202	18.079	10.908	7.171	1.27299	1.52113
Pointed	Seedling	36	3	253.458	16.248	20.629	12.359	8.27	1.26963	1.49444
Pointed	Seedling	43	1	255.286	16.508	20.309	11.934	8.375	1.23025	1.42496
Pointed	Seedling	43	2	281.337	16.831	21.161	12.011	9.15	1.25726	1.31268
Pointed	Seedling	43	3	342.966	19.205	22.921	14.509	8.412	1.19349	1.7248
Pointed	Seedling	50	1	296.772	17.883	21.668	11.782	9.886	1.21165	1.19179
Pointed	Seedling	50	2	331.203	18.692	23.605	13.206	10.399	1.26284	1.26993
Pointed	Seedling	50	3	385.045	20.035	25.538	13.47	12.068	1.27467	1.11618
Pointed	Folding	50	1	37.889	6.5	7.303	4.857	2.446	1.12354	1.98569
Pointed	Folding	50	2	42.929	6.623	7.646	5.045	2.601	1.15446	1.93964
Pointed	Folding	50	3	32.805	6.476	7.688	4.304	3.384	1.18715	1.27187
Pointed	Folding	57	1	176.33	14.363	15.627	7.666	7.961	1.088	0.962944
Pointed	Folding	57	2	164.985	13.957	15.048	8.569	6.479	1.07817	1.32258
Pointed	Folding	57	3	111.412	11.116	12.077	7.339	4.738	1.08645	1.54897
Pointed	Folding	64	1	179.664	14.11	15.945	8.282	7.663	1.13005	1.08078
Pointed	Folding	64	2	238.477	16.529	18.605	10.003	8.602	1.1256	1.16287
Pointed	Folding	64	3	148.617	12.831	13.973	7.645	6.328	1.089	1.20812
Pointed	Folding	71	1	283.616	18.602	19.317	9.504	9.813	1.03844	0.968511
Pointed	Folding	71	2	309.446	19.345	21.548	11.048	10.5	1.11388	1.05219
Pointed	Folding	71	3	172.648	16.263	14.178	8.633	5.545	0.871795	1.5569
Pointed	Folding	78	1	301.874	18.788	21.08	10.722	10.358	1.12199	1.03514
Pointed	Folding	78	2	347.197	20.416	23.679	10.832	12.847	1.15983	0.843154
Pointed	Folding	78	3	185.285	15.733	15.043	8.055	6.988	0.956143	1.15269
Pointed	Folding	85	1	304.488	18.983	21.04	9.789	11.251	1.10836	0.870056
Pointed	Folding	85	2	359.339	20.536	24.119	10.762	13.357	1.17447	0.80572
Pointed	Folding	85	3	167.353	15.659	14.085	9.792	4.293	0.899483	2.28092

## Sheet: Table S5
Supplementary Table 5. The first heading leaf of pointed and round crop types scored at different time points and plants.
NHL = No heading leaf
The different number refers to the leaf position being 1 the oldest leaf.
		Block 1			Block 2			Block 3			Leaf position (average)
56 DAS	Round	NHL			NHL			NHL			NHL
	Pointed	18	18	18	16	18	19	18	-	18.5	17.9375
63 DAS	Round	NHL			NHL			NHL			NHL
	Pointed	-	-	20	18	19	18	18.5	19.5	20.5	19.0714
70 DAS	Round	20	21	-	20.5	22.5	-	21.5	23.5	-	21.5
	Pointed	20	21	-	20	18	-	18	17	-	19
77 DAS	Round	23	23.5	-	24	25	-	24	22.5	-	23.6667
	Pointed	20	21	-	20	21	-	21.5	18	-	20.25
84 DAS	Round	25	24	-	26	25	-	23	26	-	24.8333
	Pointed	21	23	-		21.5	-		22	-	21.875

## Sheet: Table S6
Supplementary Table 6. Leaf histology parameters.
Cell Number = Number of cells that are more than half of the cell area within a rectangular area of 125,600 μm2
Cell Area = Average area (size) of complete cells included within a rectangular area of 125,600 μm2
Cell Density = The proportion of tissue occupied by cells, with the intercellular space accounting for the remaining portion of the tissue within the rectangular area of 125,600 μm2
Tissue Thickness = Thickness of palisade- and spongy mesophyll layers
Morphotype	Developmental Stage	Scoring timepoint (days after sowing)	Parenchyma side	Position in the leaf	Biological Replicate	Cell Number	Cell Area (μm2)	Cell Density	Tissue Thickness (μm)
Round	Rosette	57 DAS	Palisade	Tip	1	48	210.01	0.82	106.35
Round	Rosette	57 DAS	Palisade	Tip	2	45	268.71	0.85	106.95
Round	Rosette	57 DAS	Palisade	Tip	3	54	224.15	0.88	108.50
Round	Rosette	57 DAS	Palisade	Mid	1	52	230.20	0.91	115.86
Round	Rosette	57 DAS	Palisade	Mid	2	52	234.36	0.9	108.36
Round	Rosette	57 DAS	Palisade	Mid	3	40	265.63	0.84	133.83
Round	Rosette	57 DAS	Palisade	Base	1	38	309.07	0.9	105.51
Round	Rosette	57 DAS	Palisade	Base	2	43	271.94	0.88	99.02
Round	Rosette	57 DAS	Palisade	Base	3	35	340.68	0.95	102.36
Round	Rosette	57 DAS	Palisade	Mid Lateral	1	53	206.61	0.86	107.14
Round	Rosette	57 DAS	Palisade	Mid Lateral	2	51	176.47	0.81	101.02
Round	Rosette	57 DAS	Palisade	Mid Lateral	3	47	220.52	0.89	101.27
Round	Rosette	57 DAS	Palisade	Lateral	1	77	146.50	0.87	108.46
Round	Rosette	57 DAS	Palisade	Lateral	2	70	169.99	0.88	101.97
Round	Rosette	57 DAS	Palisade	Lateral	3	62	189.74	0.87	96.48
Round	Rosette	57 DAS	Spongy	Tip	1	43	261.07	0.79	98.84
Round	Rosette	57 DAS	Spongy	Tip	2	31	314.79	0.77	104.52
Round	Rosette	57 DAS	Spongy	Tip	3	42	245.61	0.86	99.20
Round	Rosette	57 DAS	Spongy	Mid	1	52	228.96	0.88	109.21
Round	Rosette	57 DAS	Spongy	Mid	2	54	208.50	0.86	111.99
Round	Rosette	57 DAS	Spongy	Mid	3	46	252.78	0.85	152.57
Round	Rosette	57 DAS	Spongy	Base	1	53	206.64	0.84	106.53
Round	Rosette	57 DAS	Spongy	Base	2	53	214.12	0.93	94.45
Round	Rosette	57 DAS	Spongy	Base	3	40	295.49	0.91	106.20
Round	Rosette	57 DAS	Spongy	Mid Lateral	1	48	197.24	0.79	106.47
Round	Rosette	57 DAS	Spongy	Mid Lateral	2	57	206.49	0.85	112.49
Round	Rosette	57 DAS	Spongy	Mid Lateral	3	62	214.84	0.9	108.71
Round	Rosette	57 DAS	Spongy	Lateral	1	60	182.32	0.88	100.51
Round	Rosette	57 DAS	Spongy	Lateral	2	62	164.10	0.86	88.77
Round	Rosette	57 DAS	Spongy	Lateral	3	53	204.99	0.9	99.72
Round	Rosette	85 DAS	Palisade	Tip	1	37	1830.25	0.88	226.81
Round	Rosette	85 DAS	Palisade	Tip	2	41	1517.54	0.86	225.95
Round	Rosette	85 DAS	Palisade	Tip	3	50	1180.95	0.86	200.02
Round	Rosette	85 DAS	Palisade	Mid	1	47	1290.90	0.95	193.45
Round	Rosette	85 DAS	Palisade	Mid	2	48	1325.83	0.91	193.82
Round	Rosette	85 DAS	Palisade	Mid	3	48	999.08	0.92	199.55
Round	Rosette	85 DAS	Palisade	Base	1	59	820.50	0.91	139.89
Round	Rosette	85 DAS	Palisade	Base	2	73	824.19	0.93	134.45
Round	Rosette	85 DAS	Palisade	Base	3	78	783.16	0.92	138.82
Round	Rosette	85 DAS	Palisade	Mid Lateral	1	34	1387.02	0.84	183.14
Round	Rosette	85 DAS	Palisade	Mid Lateral	2	44	1297.30	0.95	182.59
Round	Rosette	85 DAS	Palisade	Mid Lateral	3	54	1033.11	0.86	167.06
Round	Rosette	85 DAS	Palisade	Lateral	1	43	1238.73	0.86	177.96
Round	Rosette	85 DAS	Palisade	Lateral	2	60	885.74	0.88	165.03
Round	Rosette	85 DAS	Palisade	Lateral	3	53	1029.27	0.87	159.23
Round	Rosette	85 DAS	Spongy	Tip	1	35	1073.04	0.68	184.17
Round	Rosette	85 DAS	Spongy	Tip	2	41	1095.97	0.74	181.40
Round	Rosette	85 DAS	Spongy	Tip	3	59	883.39	0.83	190.56
Round	Rosette	85 DAS	Spongy	Mid	1	58	831.16	0.76	198.22
Round	Rosette	85 DAS	Spongy	Mid	2	58	919.64	0.76	203.64
Round	Rosette	85 DAS	Spongy	Mid	3	70	820.20	0.78	206.42
Round	Rosette	85 DAS	Spongy	Base	1	77	806.22	0.85	155.92
Round	Rosette	85 DAS	Spongy	Base	2	73	747.19	0.84	162.48
Round	Rosette	85 DAS	Spongy	Base	3	89	561.42	0.81	128.61
Round	Rosette	85 DAS	Spongy	Mid Lateral	1	55	992.74	0.77	195.26
Round	Rosette	85 DAS	Spongy	Mid Lateral	2	62	910.01	0.8	219.30
Round	Rosette	85 DAS	Spongy	Mid Lateral	3	57	832.51	0.74	181.95
Round	Rosette	85 DAS	Spongy	Lateral	1	66	741.48	0.74	178.84
Round	Rosette	85 DAS	Spongy	Lateral	2	62	778.76	0.7	163.95
Round	Rosette	85 DAS	Spongy	Lateral	3	63	820.80	0.81	151.62
Round	Heading	98 DAS	Palisade	Tip	1	43	799.82	0.96	165.16
Round	Heading	98 DAS	Palisade	Tip	2	67	571.47	0.94	145.86
Round	Heading	98 DAS	Palisade	Tip	3	72	530.44	0.92	137.36
Round	Heading	98 DAS	Palisade	Mid	1	37	1016.49	0.95	294.36
Round	Heading	98 DAS	Palisade	Mid	2	21	1497.16	0.93	288.90
Round	Heading	98 DAS	Palisade	Mid	3	33	1004.53	0.96	210.94
Round	Heading	98 DAS	Palisade	Base	1	25	1582.77	0.95	288.18
Round	Heading	98 DAS	Palisade	Base	2	21	2149.87	0.91	238.71
Round	Heading	98 DAS	Palisade	Base	3	25	1578.96	0.98	238.98
Round	Heading	98 DAS	Palisade	Mid Lateral	1	28	1370.44	0.95	251.05
Round	Heading	98 DAS	Palisade	Mid Lateral	2	36	1095.12	0.96	208.04
Round	Heading	98 DAS	Palisade	Mid Lateral	3	40	1059.03	0.95	199.29
Round	Heading	98 DAS	Palisade	Lateral	1	43	928.43	0.96	177.79
Round	Heading	98 DAS	Palisade	Lateral	2	42	936.20	0.94	175.26
Round	Heading	98 DAS	Palisade	Lateral	3	60	704.16	0.95	177.06
Round	Heading	98 DAS	Spongy	Tip	1	60	844.03	0.98	214.33
Round	Heading	98 DAS	Spongy	Tip	2	80	534.96	0.89	166.85
Round	Heading	98 DAS	Spongy	Tip	3	95	465.11	0.9	153.74
Round	Heading	98 DAS	Spongy	Mid	1	34	1104.25	0.91	324.22
Round	Heading	98 DAS	Spongy	Mid	2	29	1411.22	0.88	344.28
Round	Heading	98 DAS	Spongy	Mid	3	46	960.34	0.9	265.22
Round	Heading	98 DAS	Spongy	Base	1	41	1132.16	0.93	299.82
Round	Heading	98 DAS	Spongy	Base	2	29	1375.35	0.89	268.24
Round	Heading	98 DAS	Spongy	Base	3	39	1026.76	0.93	265.95
Round	Heading	98 DAS	Spongy	Mid Lateral	1	38	1129.34	0.93	274.69
Round	Heading	98 DAS	Spongy	Mid Lateral	2	47	864.23	0.85	241.21
Round	Heading	98 DAS	Spongy	Mid Lateral	3	43	981.66	0.9	220.40
Round	Heading	98 DAS	Spongy	Lateral	1	54	740.05	0.89	190.16
Round	Heading	98 DAS	Spongy	Lateral	2	59	769.71	0.9	201.09
Round	Heading	98 DAS	Spongy	Lateral	3	63	647.75	0.94	170.48
Round	Heading	126 DAS	Palisade	Tip	1	54	1139.15	0.92	186.18
Round	Heading	126 DAS	Palisade	Tip	2	57	1003.33	0.93	159.22
Round	Heading	126 DAS	Palisade	Tip	3	69	977.28	0.93	208.45
Round	Heading	126 DAS	Palisade	Mid	1	24	2338.32	0.93	350.50
Round	Heading	126 DAS	Palisade	Mid	2	22	2838.57	0.92	438.99
Round	Heading	126 DAS	Palisade	Mid	3	25	2116.73	0.93	263.80
Round	Heading	126 DAS	Palisade	Base	1	39	1450.83	0.95	268.87
Round	Heading	126 DAS	Palisade	Base	2	26	1707.10	0.9	321.40
Round	Heading	126 DAS	Palisade	Base	3	29	1977.84	0.95	288.58
Round	Heading	126 DAS	Palisade	Mid Lateral	1	34	1765.29	0.93	279.51
Round	Heading	126 DAS	Palisade	Mid Lateral	2	30	1696.17	0.92	227.00
Round	Heading	126 DAS	Palisade	Mid Lateral	3	40	1259.44	0.91	232.81
Round	Heading	126 DAS	Palisade	Lateral	1	59	897.21	0.92	189.45
Round	Heading	126 DAS	Palisade	Lateral	2	55	990.13	0.93	199.28
Round	Heading	126 DAS	Palisade	Lateral	3	65	841.35	0.94	152.69
Round	Heading	126 DAS	Spongy	Tip	1	64	981.29	0.88	187.25
Round	Heading	126 DAS	Spongy	Tip	2	89	776.06	0.87	190.91
Round	Heading	126 DAS	Spongy	Tip	3	61	803.55	0.83	193.15
Round	Heading	126 DAS	Spongy	Mid	1	34	1527.60	0.85	386.20
Round	Heading	126 DAS	Spongy	Mid	2	33	1613.60	0.85	452.50
Round	Heading	126 DAS	Spongy	Mid	3	39	1579.49	0.83	339.93
Round	Heading	126 DAS	Spongy	Base	1	44	1444.23	0.88	302.79
Round	Heading	126 DAS	Spongy	Base	2	37	1802.70	0.85	392.76
Round	Heading	126 DAS	Spongy	Base	3	43	1558.79	0.94	332.19
Round	Heading	126 DAS	Spongy	Mid Lateral	1	40	1307.95	0.77	290.05
Round	Heading	126 DAS	Spongy	Mid Lateral	2	41	1547.83	0.77	300.53
Round	Heading	126 DAS	Spongy	Mid Lateral	3	53	1185.05	0.82	270.33
Round	Heading	126 DAS	Spongy	Lateral	1	76	839.80	0.85	198.55
Round	Heading	126 DAS	Spongy	Lateral	2	62	1062.52	0.9	223.74
Round	Heading	126 DAS	Spongy	Lateral	3	87	770.72	0.93	192.70
Pointed	Rosette	57 DAS	Palisade	Tip	1	38	926.80	0.87	159.82
Pointed	Rosette	57 DAS	Palisade	Tip	2	47	837.34	0.9	173.53
Pointed	Rosette	57 DAS	Palisade	Tip	3	59	637.16	0.92	165.84
Pointed	Rosette	57 DAS	Palisade	Mid	1	45	829.98	0.93	165.94
Pointed	Rosette	57 DAS	Palisade	Mid	2	58	726.71	0.93	183.86
Pointed	Rosette	57 DAS	Palisade	Mid	3	47	901.74	0.94	208.09
Pointed	Rosette	57 DAS	Palisade	Base	1	31	1043.79	0.94	232.55
Pointed	Rosette	57 DAS	Palisade	Base	2	41	844.86	0.91	176.98
Pointed	Rosette	57 DAS	Palisade	Base	3	35	1033.59	0.95	249.93
Pointed	Rosette	57 DAS	Palisade	Mid Lateral	1	56	681.93	0.92	157.21
Pointed	Rosette	57 DAS	Palisade	Mid Lateral	2	61	682.06	0.92	170.34
Pointed	Rosette	57 DAS	Palisade	Mid Lateral	3	49	824.55	0.91	174.88
Pointed	Rosette	57 DAS	Palisade	Lateral	1	68	621.54	0.89	145.25
Pointed	Rosette	57 DAS	Palisade	Lateral	2	74	481.26	0.89	121.13
Pointed	Rosette	57 DAS	Palisade	Lateral	3	73	507.32	0.88	133.96
Pointed	Rosette	57 DAS	Spongy	Tip	1	47	792.12	0.76	174.22
Pointed	Rosette	57 DAS	Spongy	Tip	2	53	761.55	0.81	189.24
Pointed	Rosette	57 DAS	Spongy	Tip	3	74	524.87	0.82	163.36
Pointed	Rosette	57 DAS	Spongy	Mid	1	49	760.81	0.77	201.97
Pointed	Rosette	57 DAS	Spongy	Mid	2	62	607.61	0.82	201.31
Pointed	Rosette	57 DAS	Spongy	Mid	3	57	735.03	0.9	244.78
Pointed	Rosette	57 DAS	Spongy	Base	1	44	1093.40	0.88	310.46
Pointed	Rosette	57 DAS	Spongy	Base	2	57	744.83	0.82	227.20
Pointed	Rosette	57 DAS	Spongy	Base	3	45	985.53	0.95	308.33
Pointed	Rosette	57 DAS	Spongy	Mid Lateral	1	65	669.86	0.82	180.54
Pointed	Rosette	57 DAS	Spongy	Mid Lateral	2	72	500.21	0.8	155.07
Pointed	Rosette	57 DAS	Spongy	Mid Lateral	3	56	691.00	0.84	180.13
Pointed	Rosette	57 DAS	Spongy	Lateral	1	62	568.38	0.8	141.79
Pointed	Rosette	57 DAS	Spongy	Lateral	2	88	459.75	0.81	142.80
Pointed	Rosette	57 DAS	Spongy	Lateral	3	78	504.91	0.81	167.06
Pointed	Rosette	85 DAS	Palisade	Tip	1	41	1201.62	0.86	195.62
Pointed	Rosette	85 DAS	Palisade	Tip	2	36	1202.79	0.87	213.12
Pointed	Rosette	85 DAS	Palisade	Tip	3	40	1269.60	0.86	190.13
Pointed	Rosette	85 DAS	Palisade	Mid	1	43	1111.95	0.9	181.45
Pointed	Rosette	85 DAS	Palisade	Mid	2	43	1195.25	0.87	241.39
Pointed	Rosette	85 DAS	Palisade	Mid	3	44	1222.81	0.92	210.64
Pointed	Rosette	85 DAS	Palisade	Base	1	29	1949.79	0.94	234.10
Pointed	Rosette	85 DAS	Palisade	Base	2	28	1709.37	0.96	368.35
Pointed	Rosette	85 DAS	Palisade	Base	3	21	2160.18	0.94	334.11
Pointed	Rosette	85 DAS	Palisade	Mid Lateral	1	41	1461.90	0.9	196.34
Pointed	Rosette	85 DAS	Palisade	Mid Lateral	2	36	1463.24	0.93	172.54
Pointed	Rosette	85 DAS	Palisade	Mid Lateral	3	33	1536.35	0.92	214.73
Pointed	Rosette	85 DAS	Palisade	Lateral	1	30	1837.10	0.88	233.72
Pointed	Rosette	85 DAS	Palisade	Lateral	2	49	1040.86	0.92	165.57
Pointed	Rosette	85 DAS	Palisade	Lateral	3	43	1052.81	0.87	167.43
Pointed	Rosette	85 DAS	Spongy	Tip	1	41	986.92	0.64	186.46
Pointed	Rosette	85 DAS	Spongy	Tip	2	48	1010.78	0.72	240.45
Pointed	Rosette	85 DAS	Spongy	Tip	3	44	903.66	0.65	202.92
Pointed	Rosette	85 DAS	Spongy	Mid	1	58	822.46	0.65	231.73
Pointed	Rosette	85 DAS	Spongy	Mid	2	47	1012.93	0.69	282.08
Pointed	Rosette	85 DAS	Spongy	Mid	3	63	849.82	0.74	221.61
Pointed	Rosette	85 DAS	Spongy	Base	1	42	1556.90	0.9	283.92
Pointed	Rosette	85 DAS	Spongy	Base	2	39	2073.63	0.92	517.33
Pointed	Rosette	85 DAS	Spongy	Base	3	35	1947.46	0.89	434.50
Pointed	Rosette	85 DAS	Spongy	Mid Lateral	1	49	1041.23	0.74	223.45
Pointed	Rosette	85 DAS	Spongy	Mid Lateral	2	49	1285.82	0.81	245.79
Pointed	Rosette	85 DAS	Spongy	Mid Lateral	3	53	1001.96	0.8	263.29
Pointed	Rosette	85 DAS	Spongy	Lateral	1	42	1128.67	0.71	231.14
Pointed	Rosette	85 DAS	Spongy	Lateral	2	59	883.18	0.71	183.53
Pointed	Rosette	85 DAS	Spongy	Lateral	3	59	850.72	0.71	191.25
Pointed	Heading	71 DAS	Palisade	Tip	1	67	524.50	0.88	150.48
Pointed	Heading	71 DAS	Palisade	Tip	2	50	772.43	0.94	185.61
Pointed	Heading	71 DAS	Palisade	Tip	3	66	541.40	0.93	125.35
Pointed	Heading	71 DAS	Palisade	Mid	1	27	1193.89	0.96	203.48
Pointed	Heading	71 DAS	Palisade	Mid	2	23	1499.24	0.96	259.39
Pointed	Heading	71 DAS	Palisade	Mid	3	31	1188.86	0.96	214.94
Pointed	Heading	71 DAS	Palisade	Base	1	23	1334.04	0.99	199.66
Pointed	Heading	71 DAS	Palisade	Base	2	23	1594.03	0.95	416.01
Pointed	Heading	71 DAS	Palisade	Base	3	17	1867.75	0.94	437.09
Pointed	Heading	71 DAS	Palisade	Mid Lateral	1	42	644.86	0.89	115.32
Pointed	Heading	71 DAS	Palisade	Mid Lateral	2	17	1889.59	0.95	230.25
Pointed	Heading	71 DAS	Palisade	Mid Lateral	3	33	838.93	0.91	128.51
Pointed	Heading	71 DAS	Palisade	Lateral	1	71	557.26	0.9	142.14
Pointed	Heading	71 DAS	Palisade	Lateral	2	43	833.01	0.95	179.52
Pointed	Heading	71 DAS	Palisade	Lateral	3	69	552.38	0.95	146.67
Pointed	Heading	71 DAS	Spongy	Tip	1	73	592.04	0.91	171.42
Pointed	Heading	71 DAS	Spongy	Tip	2	49	791.39	0.88	191.89
Pointed	Heading	71 DAS	Spongy	Tip	3	97	421.82	0.87	155.20
Pointed	Heading	71 DAS	Spongy	Mid	1	38	1165.44	0.91	267.38
Pointed	Heading	71 DAS	Spongy	Mid	2	27	1590.28	0.87	331.27
Pointed	Heading	71 DAS	Spongy	Mid	3	32	1120.32	0.81	272.66
Pointed	Heading	71 DAS	Spongy	Base	1	43	1135.73	0.93	312.90
Pointed	Heading	71 DAS	Spongy	Base	2	26	1447.48	0.96	429.26
Pointed	Heading	71 DAS	Spongy	Base	3	19	2005.29	0.93	600.10
Pointed	Heading	71 DAS	Spongy	Mid Lateral	1	62	761.10	0.86	198.45
Pointed	Heading	71 DAS	Spongy	Mid Lateral	2	29	1740.74	0.94	313.25
Pointed	Heading	71 DAS	Spongy	Mid Lateral	3	58	772.91	0.83	188.29
Pointed	Heading	71 DAS	Spongy	Lateral	1	71	526.60	0.85	149.84
Pointed	Heading	71 DAS	Spongy	Lateral	2	48	845.66	0.89	210.46
Pointed	Heading	71 DAS	Spongy	Lateral	3	81	497.30	0.88	154.99
Pointed	Heading	99 DAS	Palisade	Tip	1	33	1424.54	0.88	211.37
Pointed	Heading	99 DAS	Palisade	Tip	2	31	1521.63	0.93	288.53
Pointed	Heading	99 DAS	Palisade	Tip	3	33	1680.18	0.87	220.27
Pointed	Heading	99 DAS	Palisade	Mid	1	43	1234.51	0.93	255.02
Pointed	Heading	99 DAS	Palisade	Mid	2	20	2241.87	0.92	337.72
Pointed	Heading	99 DAS	Palisade	Mid	3	30	1709.47	0.92	211.67
Pointed	Heading	99 DAS	Palisade	Base	1	21	2198.91	0.94	275.93
Pointed	Heading	99 DAS	Palisade	Base	2	16	3052.84	0.92	431.52
Pointed	Heading	99 DAS	Palisade	Base	3	25	2057.61	0.96	323.55
Pointed	Heading	99 DAS	Palisade	Mid Lateral	1	40	1389.19	0.94	164.47
Pointed	Heading	99 DAS	Palisade	Mid Lateral	2	26	2594.53	0.96	267.79
Pointed	Heading	99 DAS	Palisade	Mid Lateral	3	27	1621.98	0.9	208.46
Pointed	Heading	99 DAS	Palisade	Lateral	1	76	753.25	0.89	152.20
Pointed	Heading	99 DAS	Palisade	Lateral	2	46	943.06	0.87	164.57
Pointed	Heading	99 DAS	Palisade	Lateral	3	57	761.81	0.8	127.91
Pointed	Heading	99 DAS	Spongy	Tip	1	55	976.90	0.75	244.51
Pointed	Heading	99 DAS	Spongy	Tip	2	33	1579.62	0.8	287.07
Pointed	Heading	99 DAS	Spongy	Tip	3	53	978.42	0.71	269.66
Pointed	Heading	99 DAS	Spongy	Mid	1	41	1538.79	0.84	297.27
Pointed	Heading	99 DAS	Spongy	Mid	2	31	1892.28	0.85	463.05
Pointed	Heading	99 DAS	Spongy	Mid	3	44	1394.67	0.8	313.69
Pointed	Heading	99 DAS	Spongy	Base	1	24	2748.77	0.93	393.01
Pointed	Heading	99 DAS	Spongy	Base	2	23	2272.48	0.92	486.45
Pointed	Heading	99 DAS	Spongy	Base	3	29	2394.86	0.94	446.08
Pointed	Heading	99 DAS	Spongy	Mid Lateral	1	60	966.85	0.8	219.10
Pointed	Heading	99 DAS	Spongy	Mid Lateral	2	32	1875.85	0.88	318.00
Pointed	Heading	99 DAS	Spongy	Mid Lateral	3	55	1151.84	0.79	283.50
Pointed	Heading	99 DAS	Spongy	Lateral	1	84	628.18	0.78	161.47
Pointed	Heading	99 DAS	Spongy	Lateral	2	51	1259.98	0.85	238.09
Pointed	Heading	99 DAS	Spongy	Lateral	3	85	607.38	0.71	161.30

## Sheet: Table S7
Supplementary Table 7. Palisade-to-spongy parenchyma (P/S) ratio of separate leaf positions for different cellular parameters.
∆P/∆S = (PT2-PT1)/(ST2-ST1)
P/S									∆P/∆S
Morphotype	Developmental stage	Time point	Position in the leaf	Biological replicates	Tissue Thickness	Cell Area	Cell Density		Morphotype	Developmental stage	Position in the leaf	Biological replicates	Tissue Thickness	Cell Area	Cell Density
Round	Rosette	T1	Tip	1	1.07595	0.804439	1.02943		Round	Rosette	Tip	1	1.41173	1.99542	-0.49015
Round	Rosette	T1	Tip	2	1.02325	0.853593	1.115		Round	Rosette	Tip	2	1.54788	1.59867	-0.504236
Round	Rosette	T1	Tip	3	1.09366	0.912619	1.01922		Round	Rosette	Tip	3	1.00191	1.50022	0.585077
Round	Rosette	T1	Mid	1	1.06087	1.00542	1.0327		Round	Rosette	Mid	1	0.871654	1.76135	-0.367477
Round	Rosette	T1	Mid	2	0.96756	1.12404	1.046		Round	Rosette	Mid	2	0.932414	1.53481	-0.125641
Round	Rosette	T1	Mid	3	0.877124	1.05086	0.983241		Round	Rosette	Mid	3	1.22063	1.29259	-1.02037
Round	Rosette	T1	Base	1	0.99045	1.49567	1.06319		Round	Rosette	Base	1	0.696171	0.852993	2.20076
Round	Rosette	T1	Base	2	1.04842	1.27002	0.950986		Round	Rosette	Base	2	0.520721	1.03598	-0.552623
Round	Rosette	T1	Base	3	0.963867	1.15293	1.04116		Round	Rosette	Base	3	1.627	1.66389	0.307476
Round	Rosette	T1	Mid Lateral	1	1.00626	1.04747	1.09493		Round	Rosette	Mid Lateral	1	0.855988	1.48387	1.77626
Round	Rosette	T1	Mid Lateral	2	0.898114	0.854606	0.951203		Round	Rosette	Mid Lateral	2	0.763595	1.59317	-2.71029
Round	Rosette	T1	Mid Lateral	3	0.931524	1.02641	0.991588		Round	Rosette	Mid Lateral	3	0.898348	1.3156	0.173143
Round	Rosette	T1	Lateral	1	1.07911	0.803533	0.990991		Round	Rosette	Lateral	1	0.887288	1.95334	0.0921956
Round	Rosette	T1	Lateral	2	1.14868	1.0359	1.02259		Round	Rosette	Lateral	2	0.838863	1.16448	-0.00997284
Round	Rosette	T1	Lateral	3	0.967565	0.925597	0.966461		Round	Rosette	Lateral	3	1.20894	1.36331	-0.0826823
Round	Rosette	T2	Tip	1	1.23153	1.70566	1.29524		Round	Heading	Tip	1	-0.776073	2.47229	0.376032
Round	Rosette	T2	Tip	2	1.2456	1.38466	1.16336		Round	Heading	Tip	2	0.554801	1.7912	0.0330197
Round	Rosette	T2	Tip	3	1.04968	1.33685	1.03705		Round	Heading	Tip	3	1.80399	1.32028	-0.0423406
Round	Rosette	T2	Mid	1	0.975901	1.55312	1.26046		Round	Heading	Mid	1	0.905969	3.12237	0.237214
Round	Rosette	T2	Mid	2	0.951743	1.44168	1.20257		Round	Heading	Mid	2	1.38695	6.62829	0.497754
Round	Rosette	T2	Mid	3	0.966731	1.21809	1.17834		Round	Heading	Mid	3	0.707482	1.79635	0.38713
Round	Rosette	T2	Base	1	0.89723	1.01772	1.07305		Round	Heading	Base	1	-6.5064	-0.422758	0.0305564
Round	Rosette	T2	Base	2	0.827475	1.10305	1.09569		Round	Heading	Base	2	0.664093	-1.03608	0.195594
Round	Rosette	T2	Base	3	1.0794	1.39496	1.13197		Round	Heading	Base	3	0.748733	0.749723	-3.48821
Round	Rosette	T2	Mid Lateral	1	0.937925	1.39717	1.08289		Round	Heading	Mid Lateral	1	1.85341	2.21058	0.100273
Round	Rosette	T2	Mid Lateral	2	0.832594	1.42558	1.17898		Round	Heading	Mid Lateral	2	0.31959	0.879241	0.551143
Round	Rosette	T2	Mid Lateral	3	0.918171	1.24097	1.17204		Round	Heading	Mid Lateral	3	0.671371	0.985324	0.635071
Round	Rosette	T2	Lateral	1	0.995098	1.67062	1.16877		Round	Heading	Lateral	1	1.38947	-0.312968	1.37626
Round	Rosette	T2	Lateral	2	1.00661	1.13738	1.25568		Round	Heading	Lateral	2	1.06059	0.184193	1.19915
Round	Rosette	T2	Lateral	3	1.05019	1.25399	1.07397		Round	Heading	Lateral	3	-1.09686	1.11564	2.03071
Round	Heading	T1	Tip	1	0.770578	0.947616	0.983667		Pointed	Rosette	Tip	1	2.92544	1.4108	0.0880383
Round	Heading	T1	Tip	2	0.874236	1.06826	1.0507		Pointed	Rosette	Tip	2	0.773081	1.46631	0.433722
Round	Heading	T1	Tip	3	0.893448	1.14045	1.02494		Pointed	Rosette	Tip	3	0.614094	1.66961	0.38809
Round	Heading	T1	Mid	1	0.907884	0.920522	1.03894		Pointed	Rosette	Mid	1	0.521022	4.5738	0.272165
Round	Heading	T1	Mid	2	0.839128	1.06089	1.05532		Pointed	Rosette	Mid	2	0.712204	1.15596	0.509817
Round	Heading	T1	Mid	3	0.795345	1.04602	1.06991		Pointed	Rosette	Mid	3	-0.110128	2.79689	0.113082
Round	Heading	T1	Base	1	0.961156	1.39801	1.02102		Pointed	Rosette	Base	1	-0.0584356	1.95468	-0.138602
Round	Heading	T1	Base	2	0.889902	1.56315	1.02189		Pointed	Rosette	Base	2	0.659608	0.650591	0.543312
Round	Heading	T1	Base	3	0.898592	1.5378	1.05164		Pointed	Rosette	Base	3	0.667211	1.17118	0.202666
Round	Heading	T1	Mid Lateral	1	0.91392	1.21349	1.02465		Pointed	Rosette	Mid Lateral	1	0.911986	2.10026	0.19529
Round	Heading	T1	Mid Lateral	2	0.86248	1.26717	1.12986		Pointed	Rosette	Mid Lateral	2	0.0242504	0.994367	0.88393
Round	Heading	T1	Mid Lateral	3	0.904203	1.07882	1.06418		Pointed	Rosette	Mid Lateral	3	0.479197	2.28901	-0.214006
Round	Heading	T1	Lateral	1	0.934949	1.25455	1.08662		Pointed	Rosette	Lateral	1	0.990151	2.16954	0.104527
Round	Heading	T1	Lateral	2	0.871514	1.2163	1.04038		Pointed	Rosette	Lateral	2	1.09109	1.32156	-0.352798
Round	Heading	T1	Lateral	3	1.03857	1.08709	1.01545		Pointed	Rosette	Lateral	3	1.38363	1.57745	0.127781
Round	Heading	T2	Tip	1	0.994295	1.16088	1.05522		Pointed	Heading	Tip	1	0.833083	2.33862	0.0415234
Round	Heading	T2	Tip	2	0.83397	1.29286	1.07313		Pointed	Heading	Tip	2	1.08132	0.950482	0.161224
Round	Heading	T2	Tip	3	1.07923	1.21619	1.12145		Pointed	Heading	Tip	3	0.829285	2.04596	0.343591
Round	Heading	T2	Mid	1	0.907576	1.53072	1.0911		Pointed	Heading	Mid	1	1.7245	0.108792	0.412249
Round	Heading	T2	Mid	2	0.970141	1.75915	1.07151		Pointed	Heading	Mid	2	0.5944	2.45906	2.56882
Round	Heading	T2	Mid	3	0.776034	1.34014	1.12368		Pointed	Heading	Mid	3	-0.0796978	1.89756	5.28452
Round	Heading	T2	Base	1	0.887974	1.00457	1.07652		Pointed	Heading	Base	1	0.952066	0.536172	31.8906
Round	Heading	T2	Base	2	0.818313	0.94697	1.06604		Pointed	Heading	Base	2	0.271201	1.76826	0.969534
Round	Heading	T2	Base	3	0.868709	1.26883	1.0091		Pointed	Heading	Base	3	0.737177	0.487361	1.7928
Round	Heading	T2	Mid Lateral	1	0.963665	1.34966	1.21609		Pointed	Heading	Mid Lateral	1	2.38015	3.61771	-0.944369
Round	Heading	T2	Mid Lateral	2	0.755313	1.09584	1.19285		Pointed	Heading	Mid Lateral	2	7.90316	5.21725	-0.165673
Round	Heading	T2	Mid Lateral	3	0.861199	1.06277	1.10298		Pointed	Heading	Mid Lateral	3	0.839705	2.06649	0.242338
Round	Heading	T2	Lateral	1	0.954155	1.06837	1.07529		Pointed	Heading	Lateral	1	0.865004	1.92954	0.197645
Round	Heading	T2	Lateral	2	0.890654	0.931868	1.03967		Pointed	Heading	Lateral	2	-0.541	0.265607	1.95234
Round	Heading	T2	Lateral	3	0.792391	1.09164	1.01063		Pointed	Heading	Lateral	3	-2.97306	1.90242	0.876862
Pointed	Rosette	T1	Tip	1	0.917338	1.17002	1.14782
Pointed	Rosette	T1	Tip	2	0.916989	1.09953	1.11452
Pointed	Rosette	T1	Tip	3	1.01517	1.21394	1.13065
Pointed	Rosette	T1	Mid	1	0.821633	1.09092	1.21373
Pointed	Rosette	T1	Mid	2	0.913348	1.19602	1.14039
Pointed	Rosette	T1	Mid	3	0.850103	1.22681	1.04638
Pointed	Rosette	T1	Base	1	0.749056	0.954631	1.06722
Pointed	Rosette	T1	Base	2	0.778951	1.1343	1.1098
Pointed	Rosette	T1	Base	3	0.810587	1.04876	1.00959
Pointed	Rosette	T1	Mid Lateral	1	0.534537	1.01801	1.12075
Pointed	Rosette	T1	Mid Lateral	2	0.476537	1.36355	1.15156
Pointed	Rosette	T1	Mid Lateral	3	0.507394	1.19327	1.08459
Pointed	Rosette	T1	Lateral	1	1.0244	1.09353	1.10632
Pointed	Rosette	T1	Lateral	2	0.848249	1.0468	1.09796
Pointed	Rosette	T1	Lateral	3	0.801868	1.00478	1.0867
Pointed	Rosette	T2	Tip	1	1.04911	1.21755	1.35423
Pointed	Rosette	T2	Tip	2	0.886338	1.18997	1.19664
Pointed	Rosette	T2	Tip	3	0.93697	1.40495	1.32321
Pointed	Rosette	T2	Mid	1	0.783023	1.35198	1.37666
Pointed	Rosette	T2	Mid	2	0.85575	1.17999	1.25209
Pointed	Rosette	T2	Mid	3	0.950499	1.4389	1.2421
Pointed	Rosette	T2	Base	1	0.824528	1.25235	1.04011
Pointed	Rosette	T2	Base	2	0.712021	0.824335	1.04718
Pointed	Rosette	T2	Base	3	0.768953	1.10923	1.06266
Pointed	Rosette	T2	Mid Lateral	1	0.878675	1.40401	1.22239
Pointed	Rosette	T2	Mid Lateral	2	0.701981	1.13799	1.1501
Pointed	Rosette	T2	Mid Lateral	3	0.815565	1.53334	1.15336
Pointed	Rosette	T2	Lateral	1	1.01116	1.62768	1.23937
Pointed	Rosette	T2	Lateral	2	0.902141	1.17853	1.29342
Pointed	Rosette	T2	Lateral	3	0.875451	1.23756	1.21931
Pointed	Heading	T1	Tip	1	0.877844	0.885915	0.972644
Pointed	Heading	T1	Tip	2	0.967273	0.976039	1.06917
Pointed	Heading	T1	Tip	3	0.807668	1.28347	1.06749
Pointed	Heading	T1	Mid	1	0.761006	1.02441	1.0564
Pointed	Heading	T1	Mid	2	0.783017	0.942751	1.11107
Pointed	Heading	T1	Mid	3	0.788308	1.06118	1.18951
Pointed	Heading	T1	Base	1	0.638095	1.17461	1.06232
Pointed	Heading	T1	Base	2	0.969133	1.10124	0.994967
Pointed	Heading	T1	Base	3	0.728362	0.931415	1.01607
Pointed	Heading	T1	Mid Lateral	1	0.581104	0.847267	1.03558
Pointed	Heading	T1	Mid Lateral	2	0.735036	1.08551	1.00991
Pointed	Heading	T1	Mid Lateral	3	0.682511	1.08541	1.09091
Pointed	Heading	T1	Lateral	1	0.948612	1.05821	1.06679
Pointed	Heading	T1	Lateral	2	0.853005	0.985042	1.06744
Pointed	Heading	T1	Lateral	3	0.946319	1.11077	1.07836
Pointed	Heading	T2	Tip	1	0.864464	1.45822	1.1767
Pointed	Heading	T2	Tip	2	1.00509	0.963286	1.15932
Pointed	Heading	T2	Tip	3	0.816843	1.71723	1.22187
Pointed	Heading	T2	Mid	1	0.857873	0.802262	1.10872
Pointed	Heading	T2	Mid	2	0.729338	1.18475	1.08107
Pointed	Heading	T2	Mid	3	0.674774	1.22571	1.14828
Pointed	Heading	T2	Base	1	0.702094	0.799962	1.00988
Pointed	Heading	T2	Base	2	0.88708	1.3434	0.996047
Pointed	Heading	T2	Base	3	0.725318	0.859181	1.02458
Pointed	Heading	T2	Mid Lateral	1	0.750662	1.43682	1.16648
Pointed	Heading	T2	Mid Lateral	2	0.842107	1.38312	1.09121
Pointed	Heading	T2	Mid Lateral	3	0.735303	1.40816	1.13691
Pointed	Heading	T2	Lateral	1	0.94259	1.1991	1.14546
Pointed	Heading	T2	Lateral	2	0.691209	0.748472	1.02324
Pointed	Heading	T2	Lateral	3	0.792994	1.25425	1.1261

## Sheet: Table S8
Supplementary table 8. Palisade-to-spongy parenchyma (P/S) ratio of averaged leaf positions for different cellular parameters.
∆P/∆S = (PT2-PT1)/(ST2-ST1)
			P/S (T1)					P/S (T2)					∆P/∆S
Leaf type and cabbage morphotype	Parameters	Parenchyma	Replicate 1	Replicate 2	Replicate 3	Average	Standard deviation	Replicate 1	Replicate 2	Replicate 3	Average	Standard deviation	Replicate 1	Replicate 2	Replicate 3	Average	Standard deviation
Rosette leaf of round cabbage	Tissue Thickness	Palisade	108.7	103.5	108.5	106.9	2.4	184.3	180.4	172.9	179.2	4.7	75.6	76.9	64.4	72.3	5.6
		Spongy	104.3	102.4	113.3	106.7	4.7	182.5	186.2	171.8	180.2	6.1	78.2	83.7	58.5	73.5	10.8
		Palisade/Spongy	1.0	1.0	1.0	1.0	0.0	1.0	1.0	1.0	1.0	0.0	1.0	0.9	1.1	1.0	0.1
	Cell Area	Palisade	220.5	224.3	248.1	231.0	12.2	1313.5	1170.1	1005.1	1162.9	126.0	1093.0	945.8	757.0	931.9	137.5
		Spongy	215.2	221.6	242.7	226.5	11.8	888.9	890.3	783.7	854.3	50.0	673.7	668.7	540.9	627.8	61.4
		Palisade/Spongy	1.0	1.0	1.0	1.0	0.0	1.5	1.3	1.3	1.4	0.1	1.6	1.4	1.4	1.5	0.1
	Cell Density	Palisade	0.9	0.9	0.9	0.9	0.0	0.9	0.9	0.9	0.9	0.0	0.0	0.0	0.0	0.0	0.0
		Spongy	0.8	0.9	0.9	0.9	0.0	0.8	0.8	0.8	0.8	0.0	-0.1	-0.1	-0.1	-0.1	0.0
		Palisade/Spongy	1.0	1.0	1.0	1.0	0.0	1.2	1.2	1.1	1.2	0.0	-0.2	-0.5	0	-0.2	0.2
Heading leaf of round cabbage	Tissue Thickness	Palisade	235.3	211.4	192.7	213.1	17.4	254.9	269.2	229.3	251.1	16.5	19.6	57.8	36.5	38.0	15.6
		Spongy	260.6	244.3	215.2	240.0	18.8	273.0	312.1	265.7	283.6	20.4	12.3	67.8	50.5	43.5	23.2
		Palisade/Spongy	0.9	0.9	0.9	0.9	0.0	0.9	0.9	0.9	0.9	0.0	1.6	0.9	0.7	1.1	0.4
	Cell Area	Palisade	1139.6	1250.0	975.4	1121.7	112.8	1518.2	1647.1	1434.5	1533.2	87.4	378.6	397.1	459.1	411.6	34.4
		Spongy	990.0	991.1	816.3	932.5	82.1	1220.2	1360.5	1179.5	1253.4	77.5	230.2	369.4	363.2	320.9	64.2
		Palisade/Spongy	1.2	1.3	1.2	1.2	0.0	1.2	1.2	1.2	1.2	0.0	1.6	1.1	1.3	1.3	0.2
	Cell Density	Palisade	1.0	0.9	1.0	0.9	0.0	0.9	0.9	0.9	0.9	0.0	0	0	0	0	0.0
		Spongy	0.9	0.9	0.9	0.9	0.0	0.8	0.8	0.9	0.9	0.0	-0.1	0	0	-0.1	0.0
		Palisade/Spongy	1.0	1.1	1.0	1.0	0.0	1.1	1.1	1.1	1.1	0.0	0.3	0.4	0.5	0.4	0.1
Heading leaf of pointed cabbage	Tissue Thickness	Palisade	162.2	254.2	210.5	209.0	37.6	211.8	298.0	218.4	242.7	39.2	49.6	43.9	7.9	33.8	18.5
		Spongy	220.0	295.2	274.2	263.2	31.7	263.1	358.5	294.8	305.5	39.7	43.1	63.3	20.6	42.3	17.4
		Palisade/Spongy	0.7	0.9	0.8	0.8	0.1	0.8	0.8	0.7	0.8	0.0	1.2	0.7	0.4	0.7	0.3
	Cell Area	Palisade	850.9	1317.7	997.9	1055.5	194.9	1400.1	2070.8	1566.2	1679.0	285.2	549.2	753.1	568.3	623.5	92.0
		Spongy	836.2	1283.1	963.5	1027.6	188.0	1371.9	1776.0	1305.4	1484.5	208.0	535.7	492.9	341.9	456.8	83.1
		Palisade/Spongy	1.0	1.0	1.0	1.0	0.0	1.0	1.2	1.2	1.1	0.1	1.0	1.5	1.7	1.4	0.3
	Cell Density	Palisade	0.9	1.0	0.9	0.9	0.0	0.9	0.9	0.9	0.9	0.0	0	0	0	0	0.0
		Spongy	0.9	0.9	0.9	0.9	0.0	0.8	0.9	0.8	0.8	0.0	-0.1	0	-0.1	-0.1	0.0
		Palisade/Spongy	1.0	1.0	1.1	1.1	0.0	1.1	1.1	1.1	1.1	0.0	0.1	0.7	0.6	0.5	0.3
